# Supplementary material for: Effect of Mixing Intensity on Electrochemical Performance of Oxide/Sulfide Composite Electrolytes
Source: MDPI journal article supplement (doi:10.3390/batteries10030095), 2024-03-07
Supplement: s1 [file s1]

## Supplementary Materials

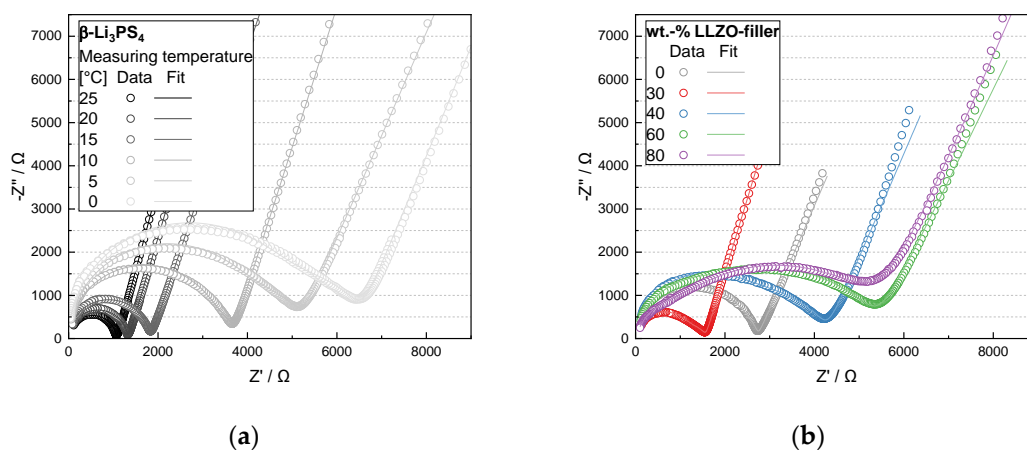

**Figure S1:** Nyquist plots of (a) LPS measured at different temperatures and (b) hybrid electrolyte pellets with varying LLZO filler content measured at 20 °C.

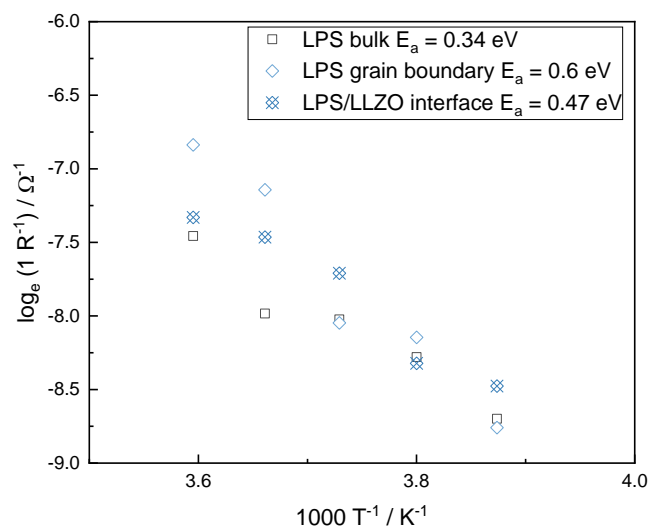

**Figure S2:** Transport properties of LPS hybrid electrolyte with 60 wt.-% LLZO filler. Arrhenius plot extracted from impedance data measured between 10 and 25 °C, separated into LPS bulk and grain boundary transport process as well as the LPS-LLZO interface transport process.

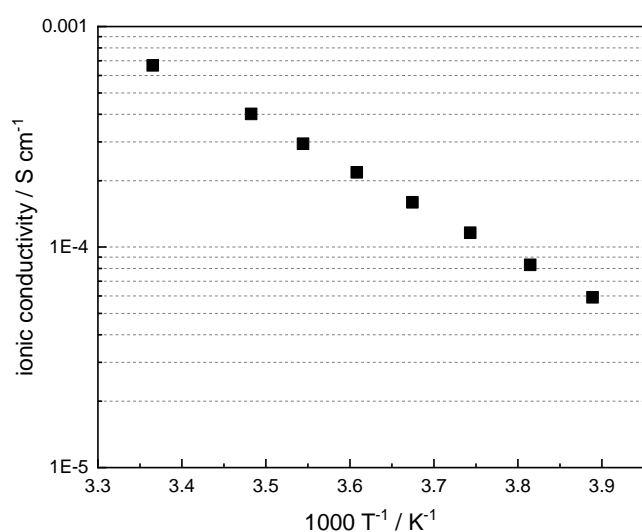

**Figure S3:** Ionic conductivity of LLZO pellets sintered above 1000 °C and polished by hand to achieve a good contact towards the blocking electrodes in the EIS measurement.

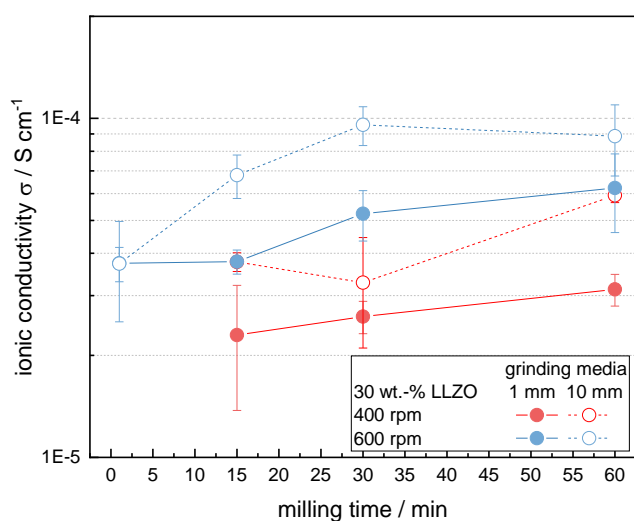

**Figure S4:** Ionic conductivity of LPS hybrid electrolyte pellets with 30 wt.-% LLZO filler contents processed by high-energy ball milling with  $ZrO_2$  grinding media varying in size at 400 rpm and 600 rpm rotational speed. The increased energy input due to the higher rotational speed influences the lithium-ion conductivity of the hybrid electrolyte significantly.

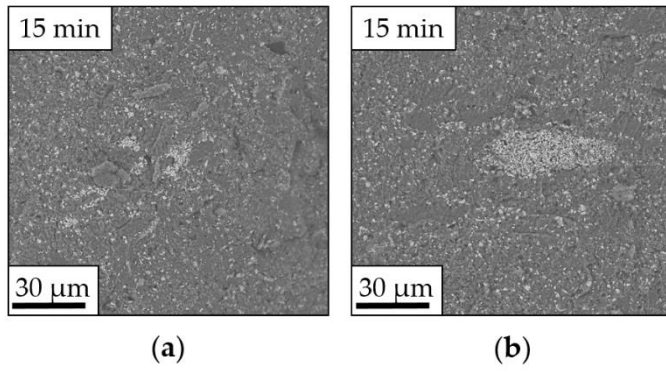

**Figure S5:** Microstructure of hybrid LPS with 30 wt.-% LLZO separator pellets processed by high-energy ball milling with 1 mm  $\text{ZrO}_2$  grinding media at (a) 400 rpm and (b) 600 rpm rotational speed showing LLZO agglomerates within the LPS matrix, the light particles are the oxide compound.

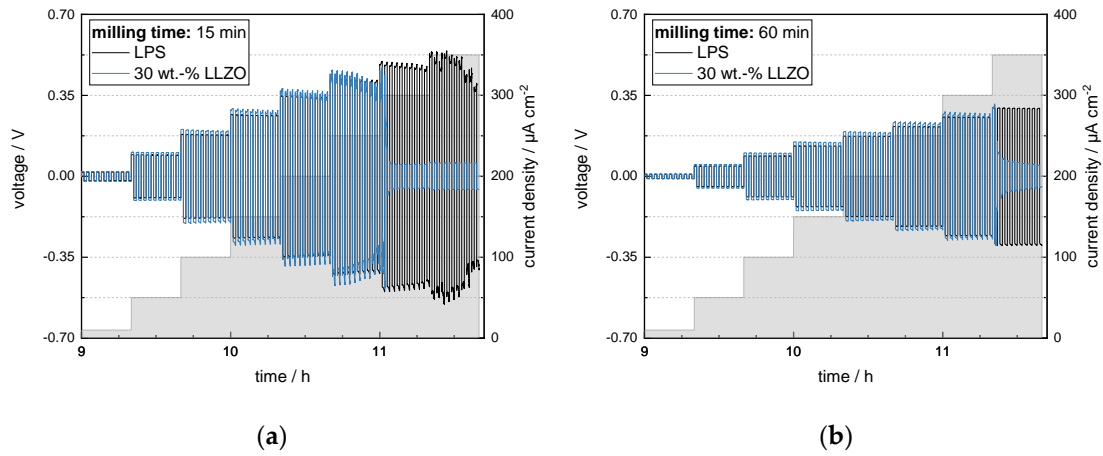

**Figure S6:** Critical current density of LPS hybrid electrolyte pellets with 30 wt.-% LLZO filler content processed by high-energy ball milling with  $\text{ZrO}_2$  grinding media size of 10 mm at a rotational speed of 600 rpm. Representative samples at (a) 15 min milling time and (b) 60 min milling time. The sample of LPS after 60 min was started in a second test ranging from 100 to 800  $\mu\text{A cm}^{-2}$  and failed at 800  $\mu\text{A cm}^{-2}$ .

**Table S1:** Ionic conductivity measured at different milling times and LLZO filler contents. Results displayed in Fig.4, 6, 10, and S4. The displayed samples were milled with a grinding media size of 10 mm and 600 rpm at 25°C unless otherwise indicated.

| <i>Milling time / min</i>          | <i>0</i>                                      | <i>1</i>        | <i>5*</i>       | <i>15</i>       | <i>30</i>       | <i>60</i>       | <i>60 + 5</i>   |
|------------------------------------|-----------------------------------------------|-----------------|-----------------|-----------------|-----------------|-----------------|-----------------|
| <i>LLZO filler content / wt.-%</i> | <i>Ionic conductivity / S cm<sup>-1</sup></i> |                 |                 |                 |                 |                 |                 |
| <i>0</i>                           | 4.1E-5 ± 2.0E-6                               | 3.7E-5 ± 3.3E-7 | 2.3E-5 ± 5.1E-7 | 1.0E-4 ± 2.9E-5 | 1.2E-4 ± 1.0E-5 | 1.7E-4 ± 9.8E-6 |                 |
| <i>10</i>                          |                                               |                 |                 |                 |                 | 1.0E-4 ± 6.2E-6 |                 |
| <i>20</i>                          |                                               |                 | 3.5E-5 ± 1.7E-6 |                 |                 | 1.0E-4 ± 9.4E-6 |                 |
| <i>30</i>                          |                                               | 3.7E-5 ± 4.3E-6 | 3.6E-5 ± 2.7E-6 | 6.8E-5 ± 9.9E-6 | 9.6E-5 ± 1.3E-5 | 8.9E-5 ± 2.1E-5 | 8.4E-5 ± 1.9E-5 |
| <i>30**</i>                        |                                               |                 |                 | 3.8E-5 ± 2.4E-6 | 3.3E-5 ± 1.2E-5 | 5.9E-5 ± 2.9E-6 |                 |
| <i>40</i>                          |                                               |                 | 3.2E-5 ± 8.1E-7 |                 |                 |                 |                 |
| <i>60</i>                          |                                               |                 | 1.1E-5 ± 4.3E-7 |                 |                 |                 |                 |
| <i>80</i>                          |                                               |                 | 8.5E-6 ± 1.7E-6 |                 |                 |                 |                 |

\*20°C, \*\*400 rpm
