# Supplementary material for: Effect of Mixing Intensity on Electrochemical Performance of Oxide/Sulfide Composite Electrolytes
Source: MDPI journal article supplement (doi:10.3390/batteries10030095), 2024-03-07
Supplement: s1 [file s1]

Archive with 1 entries (1 files):
- batteries-2873584-supplementary.pdf
